# Supplementary material for: ASET: An end-to-end pipeline for quantification and visualization of allele specific expression
Source: Research Square preprint supplement (doi:10.21203/rs.3.rs-6844336/v1), 2025-06-12
Supplement: Supplementary file 1 [file 97b11dec036ae9276c495eea.docx]

Supplementary materials for “**ASET: An end-to-end pipeline for quantification and visualization of allele specific expression”**


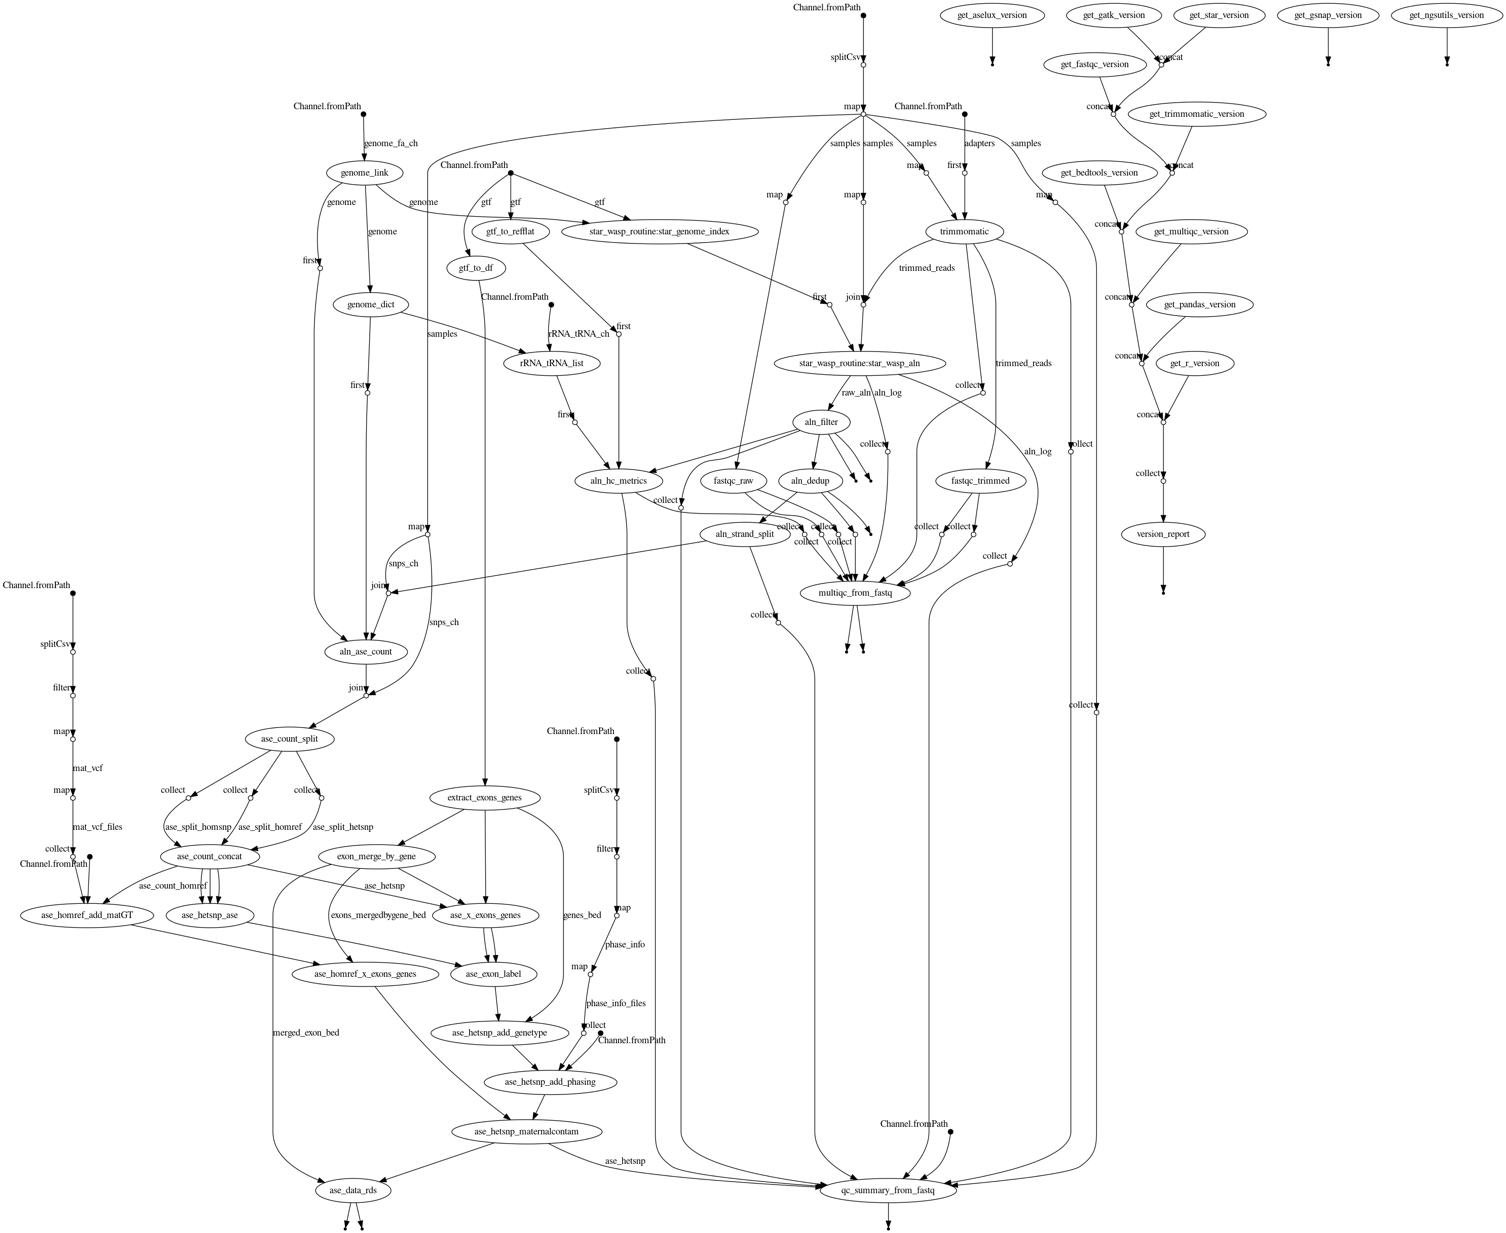


Supplementary Figure 1. ASET Nextflow pipeline DAG (STAR+WASP alignment approach).


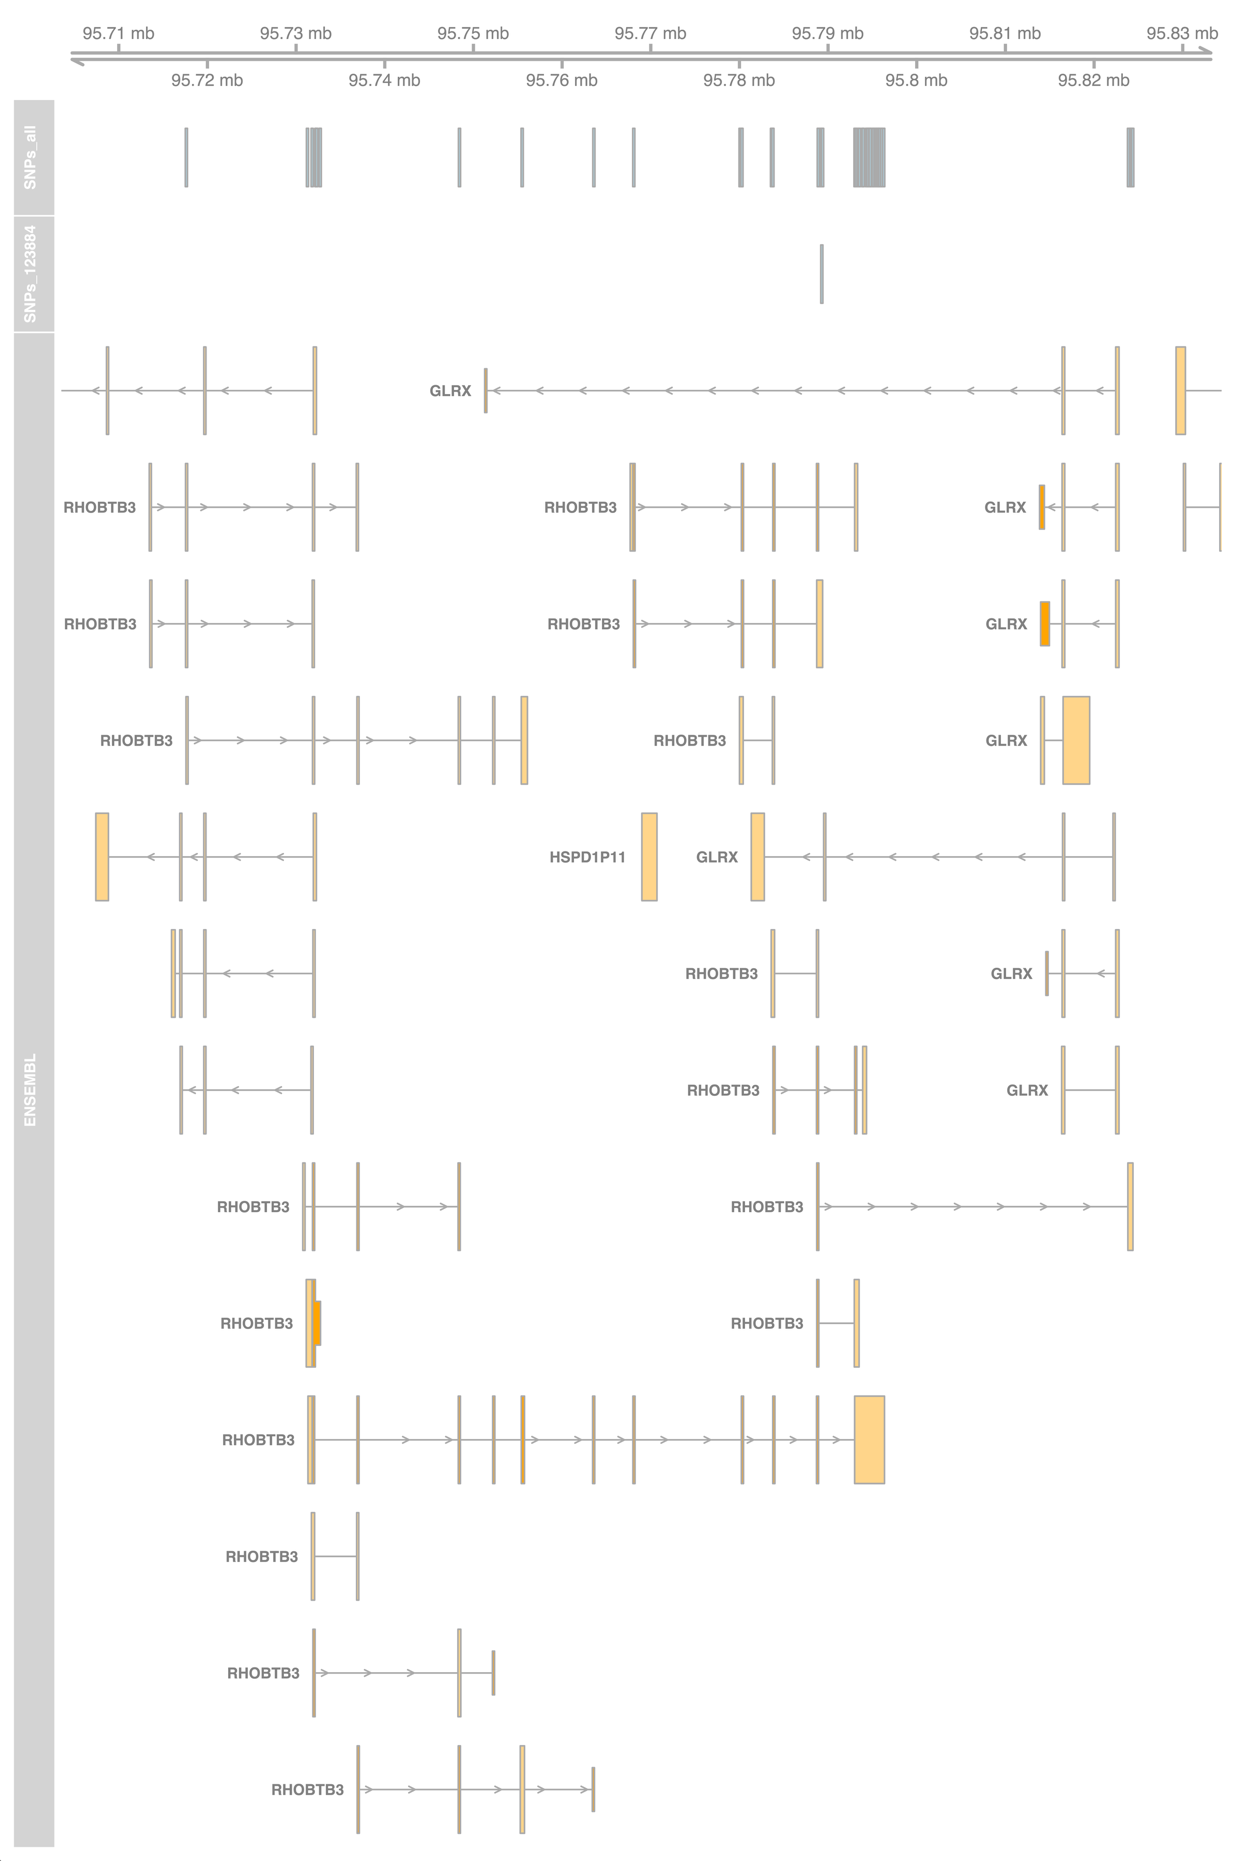


Supplementary Figure 2. SNP locations in the RHOBTB3 gene locus, with each isoform shown separately.


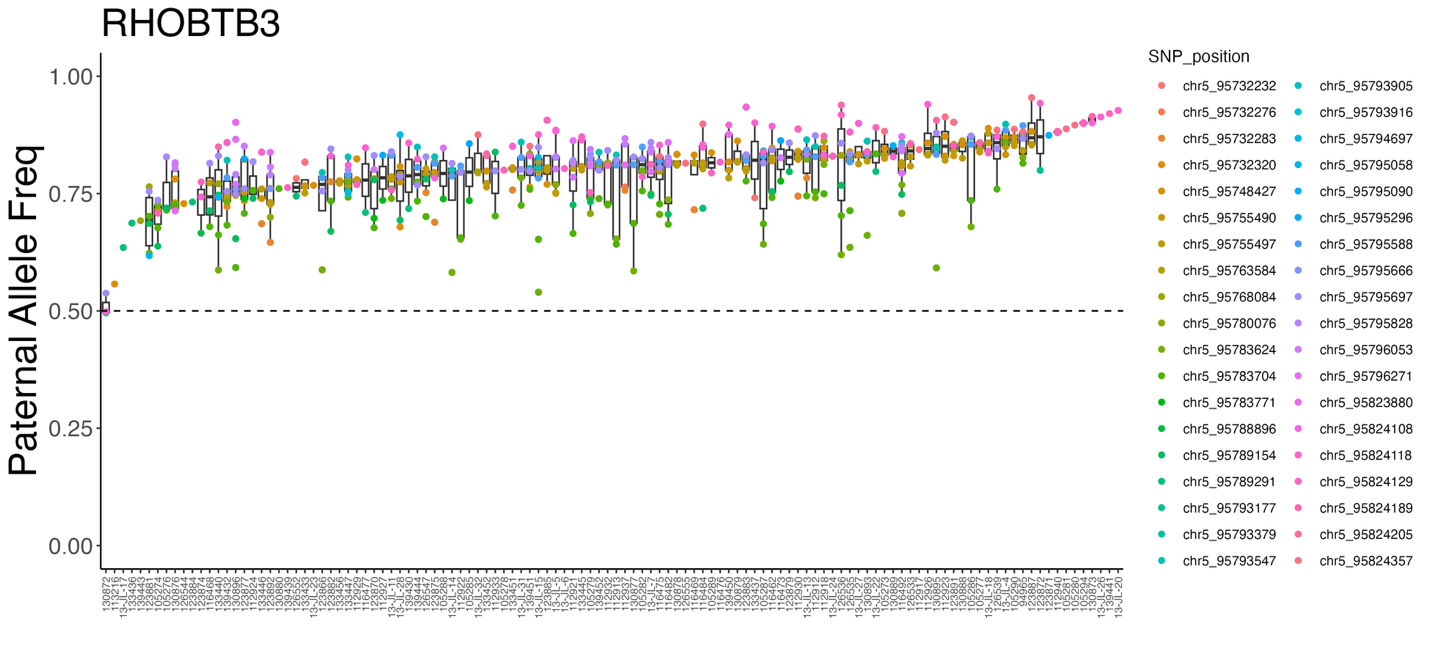


Supplementary Figure 3. Distribution of SNP-level paternal allele frequency across different samples in a gene, shown as a boxplot where each unique SNP position is indicated
